# Supplementary material for: Ecological stoichiometry of the honeybee: Pollen diversity and adequate species composition are needed to mitigate limitations imposed on the growth and development of bees by pollen quality
Source: PLoS One. 2017 Aug 22;12(8):e0183236. doi: 10.1371/journal.pone.0183236 (PMC5568746; doi:10.1371/journal.pone.0183236)
Supplement: S4 Table — (XLSX) [file pone.0183236.s004.xlsx]

## Sheet: S5
		C	N	P	S	K	Na	Ca	Mg	Fe	Zn	Mn	Cu
PPM		% (dag/kg) d.m.					ppm (mg/kg) d.m.
1	mean	48.7609	4.31913	0.533509	0.234	0.670811	64.7557	855.096	765.02	60.1263	39.1813	34.3219	8.60379
	SD	0.759622	0.0917209	0.117212	0.031305	0.0353229	6.86668	281.283	126.238	14.3624	7.16775	5.44695	1.90958
	median	49.01	4.32	0.478102	0.24	0.689359	64.7557	862.2	790.653	56.0868	43.441	32.7876	9.66449
	lower quartile	48.7165	4.258	0.452773	0.24	0.635141	59.6307	568.718	625.487	49.6411	32.4397	29.8756	6.61318
	upper quartile	49.175	4.385	0.599801	0.25	0.694776	66.7837	1114.88	887.627	68.0234	45.0643	39.7098	10.1603
	Min	47.143	4.18792	0.417314	0.18	0.6234	56.7485	488.421	591.652	46.926	29.6936	27.7052	6.51554
	Max	49.39	4.44	0.734001	0.26	0.712647	78.9584	1234.86	909.251	82.5426	46.6947	40.5736	10.4995
	N	7	7	7	5	9	9	9	9	7	9	9	7
1A	mean	47.8561	4.37091	0.355801	0.216	0.726364	71.2887	832.365	702.007	78.511	48.1612	44.4195	8.24148
	SD	0.372868	0.0370432	0.0873183	0.0114018	0.0432952	21.4222	217.176	64.8135	19.2948	4.9622	5.46371	0.963973
	median	47.97	4.375	0.355067	0.22	0.731426	68.1776	927.024	727.251	76.7146	49.5833	45.329	8.57841
	lower quartile	47.805	4.345	0.27126	0.21	0.72061	52.4015	585.762	676.968	64.7309	43.7473	39.896	7.74024
	upper quartile	48.09	4.3975	0.430008	0.22	0.748417	89.218	947.098	744.189	90.6862	52.0031	47.939	8.87839
	Min	47.1568	4.32	0.267465	0.2	0.645872	41.4536	507.152	566.088	53.3944	40.7163	36.9162	6.53077
	Max	48.16	4.41545	0.495381	0.23	0.786706	98.2565	1096.91	780.35	108.634	55.7938	51.9626	9.34394
	N	6	6	9	5	9	9	9	9	7	9	9	7
1B	mean	48.2357	3.34765	0.286021	0.152	0.43305	93.8893	720.499	445.582	37.3622	32.3923	21.3066	7.82846
	SD	1.99033	0.284493	0.0603175	0.00447214	0.0185464	17.0111	187.743	30.6818	8.23471	4.26586	2.75766	0.593483
	median	48.95	3.37993	0.268645	0.15	0.43711	89.4962	770.447	454.932	41.0751	34.3667	22.2926	7.93446
	lower quartile	47.529	3.085	0.249874	0.15	0.430956	80.7398	732.24	437.033	32.9393	32.8219	19.4589	7.57962
	upper quartile	49.42	3.555	0.3116	0.15	0.443114	105.659	825.896	465.309	42.8107	34.4929	23.1501	8.24945
	Min	44.4422	3.03	0.216508	0.15	0.393879	74.5056	275.466	389.326	23.949	23.1099	16.3439	6.83881
	Max	50.36	3.74365	0.394043	0.16	0.451291	123.53	852.157	475.149	44.4575	35.322	24.1899	8.44726
	N	7	7	7	5	8	8	8	8	6	8	8	6
1C	mean	47.8197	3.91917	0.289609	0.2	0.612373	75.9461	1066.52	798.328	70.5941	41.0526	36.6767	9.46651
	SD	1.33116	0.135223	0.101554	0.00816497	0.0181139	27.984	64.9069	35.3888	7.41709	1.14455	4.75303	1.82675
	median	48.49	3.91923	0.239063	0.2	0.608217	73.1732	1054.08	803.676	74.1174	41.1721	37.7008	10.0764
	lower quartile	47.0454	3.83712	0.227853	0.1975	0.601728	61.9744	1043.31	781.245	68.8272	40.3656	33.3506	9.62491
	upper quartile	48.73	3.9875	0.307195	0.2025	0.618115	87.4342	1104.23	826.864	74.8072	41.721	40.4343	10.4183
	Min	45.6944	3.74	0.219682	0.19	0.589652	30.6529	959.608	727.996	55.518	38.8912	29.362	5.43197
	Max	48.87	4.11658	0.456734	0.21	0.653299	116.006	1181.3	838.635	77.2543	42.9128	42.3621	10.6709
	N	6	6	8	4	9	9	9	9	7	9	9	7
2	mean	48.6786	3.87	0.379335	0.206	0.651625	87.0157	1131.29	839.246	120.977	41.627	109.04	7.93882
	SD	1.15034	0.472193	0.130679	0.0901665	0.0542531	34.3496	443.056	118.821	40.6104	7.64472	27.5721	4.38744
	median	48.79	3.95	0.350604	0.206	0.652412	78.3482	1302.82	846.815	128.041	44.9623	113.262	8.98207
	lower quartile	47.84	3.53	0.270043	0.15	0.623414	57.1011	762.262	762.503	100.91	35.6829	97.4943	4.85614
	upper quartile	49.665	4.165	0.452301	0.21	0.666328	106.167	1355.9	914.71	154.695	46.4778	127.531	11.367
	Min	47.03	3.24	0.248485	0.14	0.574299	53.7241	412.563	613.867	51.4078	29.7368	51.3812	2.0632
	Max	49.92	4.51	0.566929	0.36	0.76971	154.418	1639.16	1020.97	168.479	49.4071	144.64	12.4257
	N	7	7	8	5	10	10	10	10	10	10	10	5
2A	mean	48.4667	4.565	0.454354	0.15	0.78882	93.375	1137.12	773.855	165.39	43.0979	22.4127	7.96363
	SD	0.389906	0.26898	0.149929	0.0268328	0.0448577	44.2308	308.736	72.9648	49.3571	4.40471	6.42176	2.88844
	median	48.38	4.545	0.411915	0.155	0.802512	76.5021	1068.41	785.087	152.083	44.2749	23.2458	8.97457
	lower quartile	48.205	4.4525	0.357849	0.15	0.754762	67.8925	993.492	741.991	124.444	39.6449	16.1901	5.36263
	upper quartile	48.6675	4.675	0.511335	0.16	0.823559	96.2982	1404.47	812.213	214.405	46.9268	24.7882	9.54179
	Min	48.04	4.18	0.306109	0.1	0.716597	58.6741	684.686	635.988	107.893	36.7064	13.7184	3.43111
	Max	49.09	4.98	0.764488	0.18	0.849675	202.191	1573.41	865.333	228.651	47.6749	33.4349	11.873
	N	6	6	8	6	9	9	9	9	8	9	9	9
2B	mean	48.8967	3.195	0.643274	0.08	0.648657	70.7608	1377.59	1328.01	96.7711	44.3178	23.4828	8.16744
	SD	0.914826	0.42679	0.0754375	0.0316228	0.0342794	10.7098	282.984	96.008	23.5093	5.00565	7.67874	2.53469
	median	49.245	3.12	0.624328	0.075	0.645895	72.5469	1413.72	1339.87	93.6376	46.2005	25.7108	7.43108
	lower quartile	48.2025	2.885	0.589951	0.0625	0.633676	63.4261	1163.11	1265.15	86.2074	40.9485	21.2591	6.20372
	upper quartile	49.5	3.37	0.69586	0.095	0.662704	80.2855	1618.88	1392.51	112.187	47.2817	28.1611	9.66265
	Min	47.63	2.76	0.560782	0.04	0.598242	54.6246	941.188	1176.53	61.1036	35.9361	10.5164	5.34088
	Max	49.82	3.91	0.752014	0.13	0.703009	81.2308	1704.29	1471.11	131.046	50.2222	31.5841	12.1693
	N	6	6	6	6	8	8	8	8	8	8	8	8
2C	mean	48.28	3.43	0.357819	0.118333	0.487702	71.9103	1449.99	795.417	120.218	48.2129	324.925	4.80765
	SD	0.6001	0.742644	0.166319	0.0519294	0.0541751	28.7563	460.543	63.8599	35.0849	5.43107	31.6811	2.91218
	median	48.375	3.345	0.319923	0.115	0.47652	64.4885	1670.37	827.004	120.853	48.5635	335.197	4.65363
	lower quartile	48.0525	2.9075	0.223222	0.085	0.453522	46.38	1212.74	729.872	108.967	43.7826	295.926	2.66153
	upper quartile	48.7125	3.94	0.454754	0.1525	0.500252	98.6579	1802.99	843.117	145.578	52.4989	343.433	6.79975
	Min	47.28	2.53	0.188125	0.05	0.414994	40.1012	578.086	704.751	48.9516	40.3296	282.16	1.84462
	Max	48.88	4.46	0.640732	0.19	0.592939	110.828	1845.58	859.171	163.382	55.9153	366.965	8.07873
	N	6	6	7	6	10	10	10	10	10	10	10	4
2D	mean	49.99	3.96	0.367802	0.195	0.634506	102.782	949.383	846.119	95.0615	30.2554	12.6156	4.68637
	SD	1.00852	0.2002	0.18761	0.0777817	0.075961	28.0811	461.24	165.605	40.1445	7.83631	3.91745	2.13386
	median	50.26	3.91	0.290842	0.195	0.624956	101.522	947.564	892.94	98.7894	33.5861	11.5281	3.47517
	lower quartile	50.1325	3.91	0.242674	0.1675	0.57776	83.4611	551.359	720.016	56.2549	23.4331	10.5106	3.24242
	upper quartile	50.53	3.94	0.421479	0.2225	0.673325	112.382	1363.54	934.214	130.543	34.879	13.9166	6.01701
	Min	47.99	3.74	0.22428	0.14	0.540658	66.8396	252.821	600.482	42.7505	17.7649	7.09666	2.55815
	Max	50.72	4.34	0.709204	0.25	0.778718	156.135	1496.23	1067.15	153.308	38.3413	20.0211	8.25237
	N	6	6	6	2	10	10	10	10	10	10	9	7
